# Supplementary material for: Conditioning the microenvironment for soft tissue regeneration in a cell free scaffold
Source: PubMed Central journal article supplement (PMC8233309; doi:10.1038/s41598-021-92732-9), 2021-06-25
Supplement: 41598_2021_92732_MOESM1_ESM.pdf [file 41598_2021_92732_MOESM1_ESM.pdf]

## Supplementary data

**Title:** Conditioning the microenvironment for targeted *in vivo* adipogenesis and soft tissue regeneration in a cell-free poly(urethane-ester)-based scaffold

**Authors:** Iridi Gerges<sup>\*§1</sup>, Margherita Tamplenizza<sup>\*1</sup>, Federico Martello<sup>1</sup>, Stefano Koman<sup>1</sup>, Giulia Chincarini<sup>1</sup>, Camilla Recordati<sup>2</sup>, Mariacaterina Tamplenizza<sup>1</sup>, Scott Guelcher<sup>3</sup>, Maurizio Crestani<sup>4</sup>, Alessandro Tocchio<sup>§1</sup>.

\* IG and MT contributed equally to this manuscript

§ Corresponding authors: Iridi Gerges, E-mail: [irini.gerges@tensivemed.com](mailto:irini.gerges@tensivemed.com), Alessandro Tocchio, E-mail: [alessandro.tocchio@tensivemed.com](mailto:alessandro.tocchio@tensivemed.com)

### Affiliations:

- 1 Tensive SRL. Via Timavo 34, Milan, Italy;
- 2 Dipartimento di Medicina Veterinaria. Università degli Studi di Milano, Via dell'Università, 6, 26900 Lodi, Italy;
- 3 Department of Chemical and Biomolecular Engineering, Vanderbilt University, PMB 351604 2301 Vanderbilt Place, Nashville, TN 37235-1604, USA;
- 4 Dipartimento di Scienze Farmacologiche e Biomolecolari – DiSFeB. Università degli Studi di Milano, Via Balzaretto, 9, 20133 Milan, Italy;

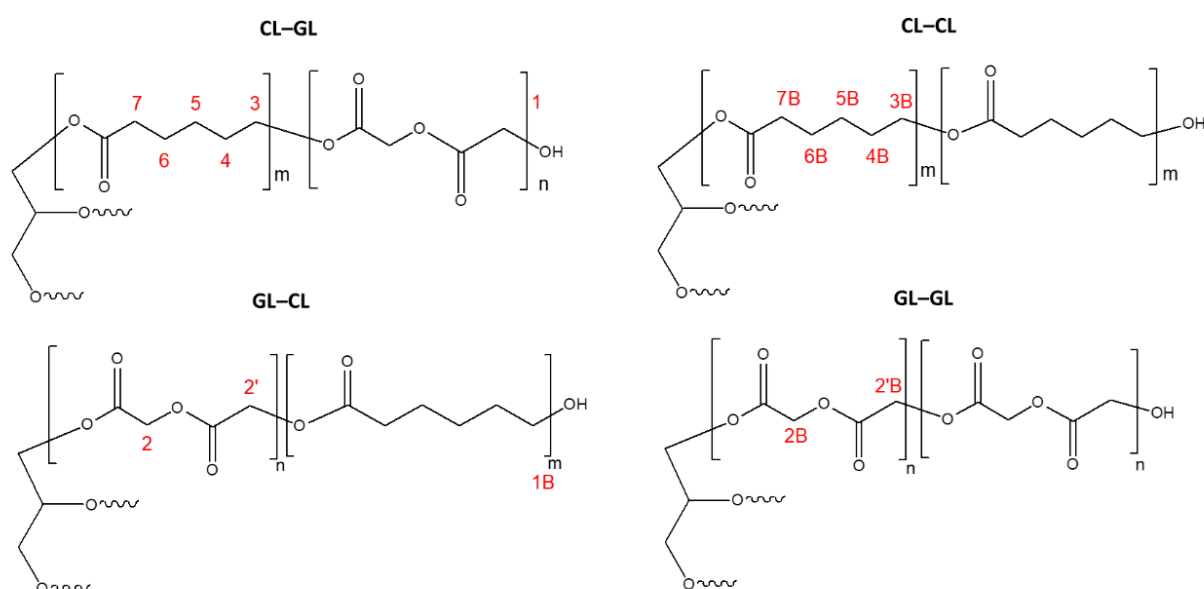

**Figure S1.** Chemical structure of P(CL-co-GL)triol. Only one branch of the star polymer is represented. The 4 alternations between CL and GL units: CL-GL; CL-CL; GL-CL; GL-GL were reported, where the relevant protons were numbered in red for structural elucidation by HNMR spectroscopy

| Signals<br>(ppm) | Assignment                  | Total H<br>number | P(CL-co-GL) 4:1 |            | P(CL-co-GL) 10:1 |            | P(CL-co-GL) 20:1 |            |
|------------------|-----------------------------|-------------------|-----------------|------------|------------------|------------|------------------|------------|
|                  |                             |                   | integral        | norm. area | integral         | norm. area | integral         | norm. area |
| 1.2- 1.9         | 4,5,6,4B,5B,6B (CL)         | 6                 | 610.69          | 101.78     | 448.53           | 74.76      | 393.26           | 65.54      |
| 2.3              | 7B (CL)                     | 2                 | 100.22          | 50.11      | 100              | 50         | 100.24           | 50.12      |
| 2.44             | 7 (CL)                      | 2                 | 84.06           | 42.03      | 26.82            | 13.41      | 12.35            | 6.18       |
| 3.65             | 1B (chain end groups)       | 2                 | 2.1             | 1.05       | 3.64             | 0.91       | 3.18             | 1.59       |
| 3.75             | 1 (chain end groups)        | 2                 | -               | -          | -                | -          | -                | -          |
| 4.07             | 3B (CL)                     | 2                 | 100             | 50         | 100              | 50         | 100              | 50         |
| 4.18             | 3 (CL)                      | 2                 | 84.7            | 42.35      | 26.88            | 13.44      | 12.27            | 6.14       |
| 4.6- 4.74        | 2,2B,2',2'B (GL)            | 4                 | 84.66           | 21.17      | 28.6             | 7.15       | 11.97            | 2.99       |
|                  | [CL]/[GL] <sub>HNMR</sub> = |                   | 4.36            |            | 8.87             |            | 18.78            |            |
|                  | [CL]/[GL] <sub>Feed</sub> = |                   | 4               |            | 10               |            | 20               |            |

**Table S1.** Semi-quantification of the CL: GL ratio among the 3 polyesters: P(CL-co-GL) triol synthesized in the present study

| Response                                                                                                                          | Cell type                                                                                                                              | Score |                                                                                       |                                                                               |                                                                    |                                                                        |
|-----------------------------------------------------------------------------------------------------------------------------------|----------------------------------------------------------------------------------------------------------------------------------------|-------|---------------------------------------------------------------------------------------|-------------------------------------------------------------------------------|--------------------------------------------------------------------|------------------------------------------------------------------------|
|                                                                                                                                   |                                                                                                                                        | 0     | 1                                                                                     | 2                                                                             | 3                                                                  | 4                                                                      |
| <b>Encapsulation</b>                                                                                                              |                                                                                                                                        | 0     | Partial to complete thin band of granulation tissue/fibrosis surrounding the scaffold | Moderately thick band of granulation tissue/fibrosis surrounding the scaffold | Thick band of granulation tissue/fibrosis surrounding the scaffold | Extensive band of granulation tissue/fibrosis surrounding the scaffold |
|                                                                                                                                   | Granulocytes (G) (including neutrophils and eosinophils)                                                                               | 0     | Minimal infiltrate, 1-5/HPF                                                           | Mild infiltrate, 5-10/HPF                                                     | Moderate infiltrate, 10-30/HPF                                     | Heavy infiltrate                                                       |
| <b>Inflammation</b>                                                                                                               | Lymphocytes (L)                                                                                                                        | 0     | Minimal infiltrate, 1-5/HPF                                                           | Mild infiltrate, 5-10/HPF                                                     | Moderate infiltrate                                                | Heavy infiltrate                                                       |
|                                                                                                                                   | Plasma cells (P)                                                                                                                       | 0     | Minimal infiltrate, 1-5/HPF                                                           | Mmild infiltrate, 5-10/HPF                                                    | Moderate infiltrate                                                | Heavy infiltrate                                                       |
|                                                                                                                                   | Macrophages                                                                                                                            | 0     | Minimal infiltrate, 1-10/HPF                                                          | Mild infiltrate, 10-30/HPF                                                    | Moderate infiltrate                                                | Heavy infiltrate                                                       |
|                                                                                                                                   | Multinucleated giant cells (MGCs)                                                                                                      | 0     | Minimal infiltrate, 1-2/HPF                                                           | Mild infiltrate, 3-5/HPF                                                      | Moderate infiltrate 6-9/HPF                                        | Heavy infiltrate >10/HPF                                               |
| <b>Necrosis</b>                                                                                                                   | Necrotic debris = nuclear basophilic granular debris and/or cytoplasmic eosinophilic amorphous material surrounding the test material. | 0     | Minimal amount                                                                        | Mild amount                                                                   | Moderate amount                                                    | Large amount                                                           |
| <b>Tissue ingrowth into porous scaffolds (including Total tissue ingrowth adipose tissue, fibrous tissue, mesenchymal tissue)</b> |                                                                                                                                        | 0     | <25% of Total available space                                                         | 25-50% of Total available space                                               | 50-75% of Available total space                                    | >75% of Available total space                                          |

HPF = high power field (field at 400x)

A total inflammation score was also calculated by adding the scores of G+L+P+M+MGCS (range 0-15)

**Table S2.** Histologic scoring system for Biocompatibility evaluation according to ISO 10993-6:2007, slightly modified to adapt to the present study
